# Supplementary material
Source: publisher figshare collection journal article supplement (https://acs.figshare.com/ndownloader/files/5906787)
Supplement: Supplementary file 1 [file 5906787]

## Supporting Information

### **Crystal Structures of Quinolinate Synthase in Complex with a Substrate Analogue, the Condensation Intermediate and Substrate-derived Product.**

Anne Volbeda, Claudine Darnault, Oriane Renoux, Debora Reichmann, Patricia Amara, Sandrine Ollagnier de Choudens, Juan C. Fontecilla-Camps\*

**Table S1.** Specific quinolinate synthase activity of NadA proteins from *T. maritima* and *E. coli*. Neither *TmNadA*\* Y107F nor *TmNadA*\*-PGH formed QA. The activities of *TmNadA* and *EcNadA* were assayed using oxaloacetate and ammonium sulfate as the iminoaspartate (IA) source. Activity values are reported for the same [4Fe-4S] cluster concentration. n.d = not detectable.

|                                  | Specific activity<br>(nmoles/min/mg) |
|----------------------------------|--------------------------------------|
| <i>TmNadA</i> *                  | 16.4                                 |
| <i>TmNadA</i> * Y21F             | 0.8                                  |
| <i>TmNadA</i> * Y107F            | n.d                                  |
| PGH-bound <i>TmNadA</i>          | n.d                                  |
| <i>EcNadA</i>                    | 62.4                                 |
| <i>EcNadA</i> Y139F <sup>1</sup> | n.d                                  |
| PGH-bound <i>EcNadA</i>          | 6.1                                  |

<sup>1</sup>no activity was detected when using NadB and L-aspartate to produce IA

**Table S2.** X-ray data and refinement statistics.

| <b>Crystal (<i>TmNadA</i>*)</b>                        | <b>Y107F-W</b>   | <b>Y21F-QA</b>   | <b>Y107F-PGH</b> | <b>Y21F-citrate</b> | <b>Citrate</b>   |
|--------------------------------------------------------|------------------|------------------|------------------|---------------------|------------------|
| <b>PDB code</b>                                        | 5F3D             | 5LQS             | 5F33             | 5LQM                | 5F35             |
| <b>Data collection:</b>                                |                  |                  |                  |                     |                  |
| ESRF beamline                                          | ID30A3           | BM30A            | ID30B            | ID30B               | ID23eh2          |
| Wavelength (Å)                                         | 0.96770          | 0.979736         | 0.96862          | 0.96862             | 0.87260          |
| Cell: a, b, c (Å)                                      | 53.9, 49.0, 60.5 | 52.1, 48.7, 60.3 | 52.1, 49.2, 60.2 | 52.8 48.9 60.4      | 49.0, 49.3, 62.7 |
| Cell: $\beta$ (°)                                      | 105.4            | 103.7            | 104.1            | 104.6               | 104.3            |
| Resolution (Å)                                         | 45.2-1.90        | 43.7-1.90        | 37.6-1.45        | 37.5-1.62           | 49.3-1.57        |
| (high resolution shell)                                | (1.96-1.90)      | (1.97-1.90)      | (1.50-1.45)      | (1.68-1.62)         | (1.62-1.57)      |
| Measured reflections                                   | 98781 (9058)     | 83943 (7948)     | 143402 (14225)   | 87798 (5465)        | 218575 (18713)   |
| Unique reflections                                     | 23542 (2157)     | 23026 (2228)     | 51724 (5059)     | 34681 (2297)        | 40043 (3641)     |
| Redundancy                                             | 4.2 (4.2)        | 3.6 (3.6)        | 2.8 (2.8)        | 2.5 (2.4)           | 5.5 (5.1)        |
| Completeness (%)                                       | 97.0 (89.1)      | 98.6 (97.8)      | 98.5 (98.7)      | 91.0 (62.0)         | 99.1 (99.1)      |
| $R_{\text{merge}}$ (%)                                 | 7.0 (89.3)       | 9.4 (58.8)       | 4.0 (55.5)       | 4.4 (45.4)          | 10.0 (84.1)      |
| $CC_{1/2}$                                             | 0.997 (0.573)    | 0.989 (0.551)    | 0.998 (0.556)    | 0.998 (0.490)       | 0.997 (0.376)    |
| $\langle I/\sigma_I \rangle$                           | 9.5 (1.4)        | 15.2 (2.9)       | 12.0 (1.7)       | 12.0 (1.8)          | 9.5 (1.5)        |
| <b>Refinement:</b>                                     |                  |                  |                  |                     |                  |
| Resolution (Å)                                         | 45.0-1.90        | 40.0-1.90        | 30.0-1.45        | 37.5-1.62           | 27.8-1.60        |
| Used reflections                                       | 22317            | 21850            | 49128            | 32948               | 36433            |
| $R_{\text{work}}$ (%)                                  | 17.0             | 17.6             | 14.1             | 14.9                | 12.8             |
| Reflections for $R_{\text{free}}$                      | 1182             | 1175             | 2574             | 1733                | 1896             |
| $R_{\text{free}}$ (%)                                  | 21.1             | 21.4             | 18.6             | 20.1                | 17.7             |
| Number of atoms                                        | 2779             | 2824             | 2826             | 2778                | 2872             |
| Average B-factor (Å <sup>2</sup> )                     | 36.9             | 21.1             | 22.3             | 23.0                | 19.9             |
| R.m.s. deviations                                      |                  |                  |                  |                     |                  |
| Bond lengths (Å)                                       | 0.012            | 0.012            | 0.011            | 0.012               | 0.012            |
| Bond angles (°)                                        | 1.5              | 1.6              | 1.5              | 1.5                 | 1.6              |
| Ligand occupancy*                                      | 1.00             | 0.65             | 0.75             | 1.00                | 2 x 0.50         |
| $\langle B_{\text{ligand}} \rangle$ (Å <sup>2</sup> )* | 45.2             | 17.5             | 21.1             | 21.6                | 15.4             |

\*lower than 1.00 occupancies and/or higher than average  $\langle B \rangle$ -factors for the ligands (W, QA, PGH and citrate) reflect the presence of some structural disorder/heterogeneity.

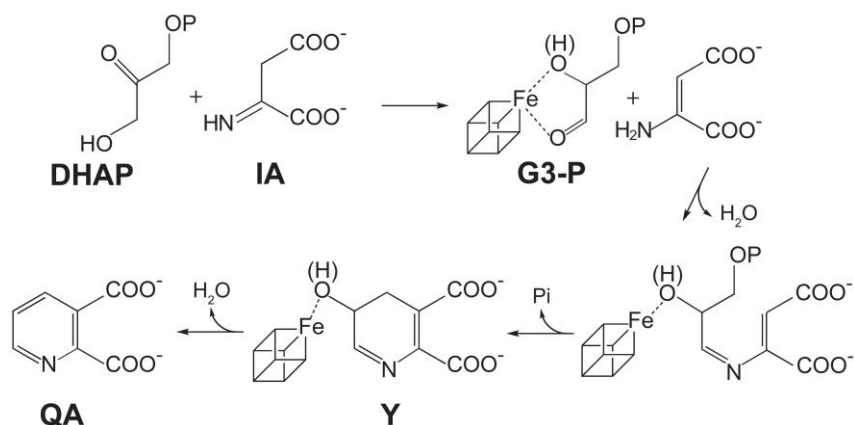

**Scheme S1.** Alternative mechanism (to the one presented in **Scheme 1**) for QA synthesis proposed by Begley et al.<sup>1</sup> In this mechanism dephosphorylation takes place after condensation, which is ruled out by our results.

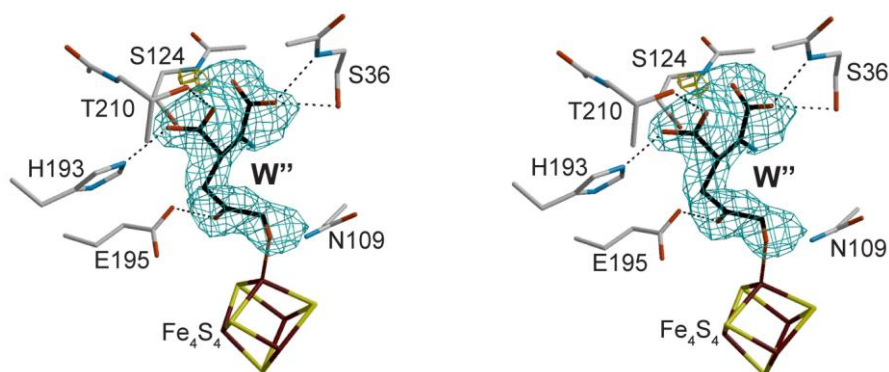

**Figure S1.** Stereo view of the model and electron density 'omit' map (in blue mesh) of a *TmNadA* complex with **W''**: this species has been modeled as an alternative conformation of **W** with its N atom positioned in the residual electron density peak that was obtained with **W'** (**Figure 1** and main text). The small brown peak (contoured at 4  $\sigma$ ) represents residual electron density when **W''** is included in the calculated structure factors and phases. It is not possible to determine from the electron density whether the C2-bound group in this species is =NH or –NH<sub>2</sub> (or a mixture of the two species).

**A**

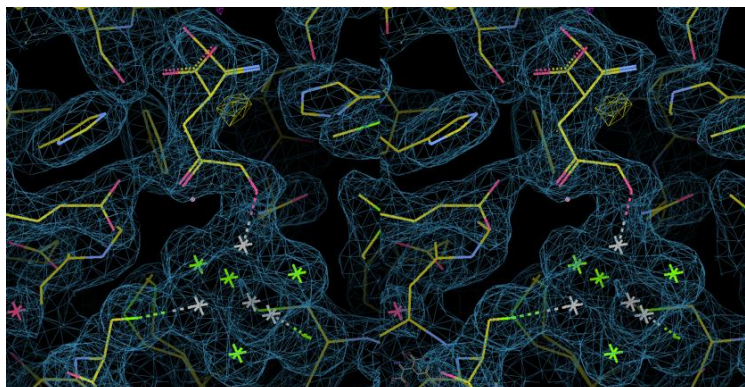

**B**

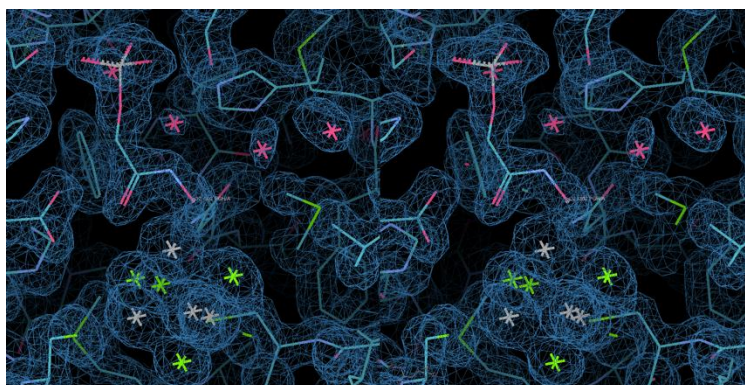

**C**

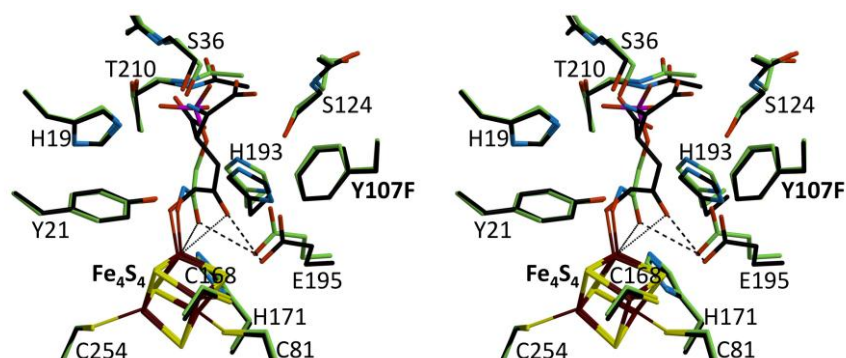

**Figure S2.** (A) *TmNadA*\* Y107-**W'** complex and matching (2Fo-Fc) electron density map (contoured at  $1.0\sigma$ ). The residual peak (yellow, contoured at  $4.0\sigma$ ) indicates the alternate position for the 2-imino/amino group closer to C6 (see main text). (B) *TmNadA*\* Y107-**PGH** complex and matching (2Fo-Fc) electron density map. (C) Superposition of **W'** (black carbons) and **PGH** (green carbons) crystal structures. In both cases, the  $-\text{O}(\text{H})$  group, which is similarly oriented, interacts more tightly with the unique iron ion than the  $>\text{C}=\text{O}$  group. The phosphate moiety of **PGH** occupies the position corresponding to mostly one of the carboxylate groups of **W'**.

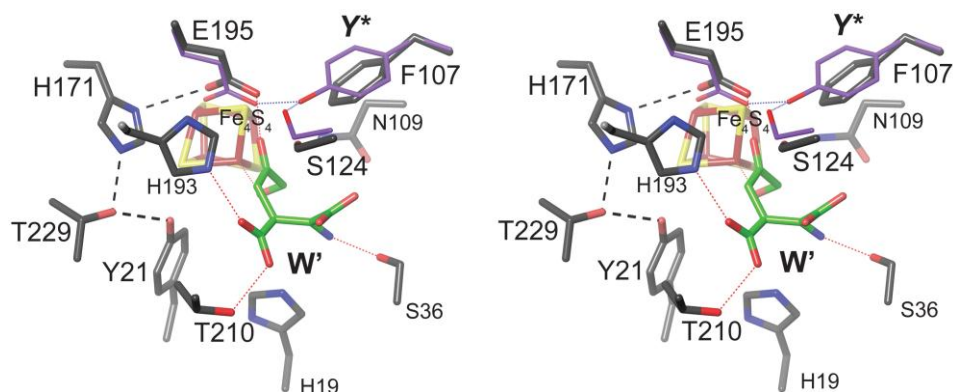

**Figure S3.** Stereo view of **Figure 8** of main text.

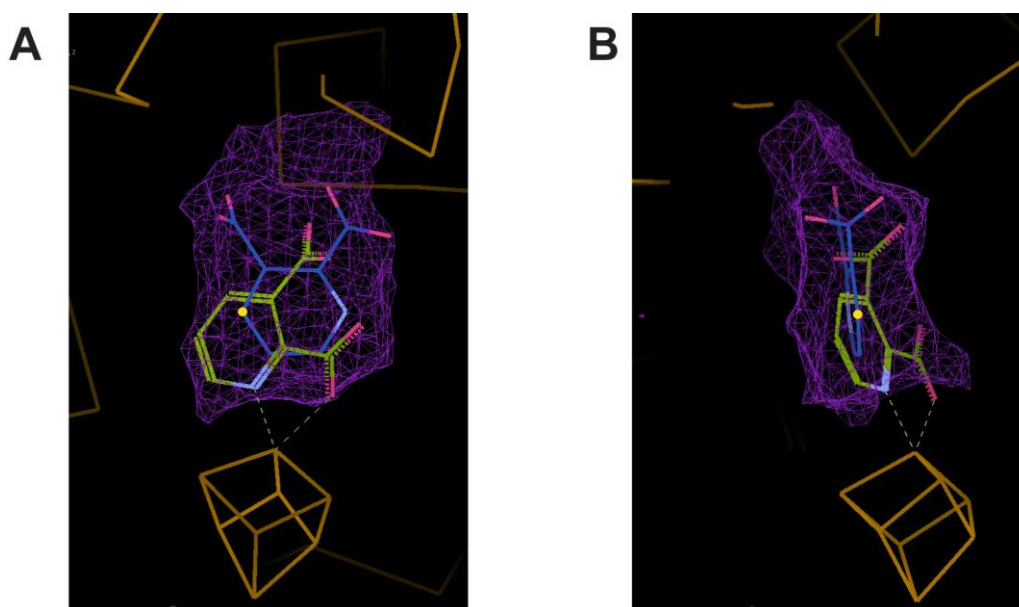

**Figure S4.** The active site of the *TmNadA*\* Y10F-**W** structure represented by a cavity map calculated with the CAVENV program developed by A. Volbeda and included in the CCP4 package<sup>2</sup> (purple mesh; probe radius = 1.0 Å), with solvent and **W** removed. (A) Superposition of QA bound as in the *TmNadA* Y21F variant crystal (green carbon atoms, see also **Figure 4**) and its expected position immediately after the second dehydration (**Y** → QA in **Scheme 1**; shown here with blue carbon atoms). (B) The same superposition rotated by 90° about a vertical axis. Two simple rotations of QA, resulting from the observed **W** orientation (see main text and **Figure 1**), bring it to its observed binding mode in the crystal structure (**Figure 4**). An alternative **W** position, rotated about 180° from the one observed in our structure, would locate the QA N1 (**Scheme 1**) at the site corresponding to its C4 (indicated by a yellow dot on the modeled QA structure with dark blue carbon atoms). Starting from that alternative position, a 180° QA rotation about a vertical axis, in addition to the two simple rotations described above, would be required to reproduce its observed binding mode. The first (180°) rotation would cause severe clashes with the protein, as shown by the flattened shape of the active site cavity.

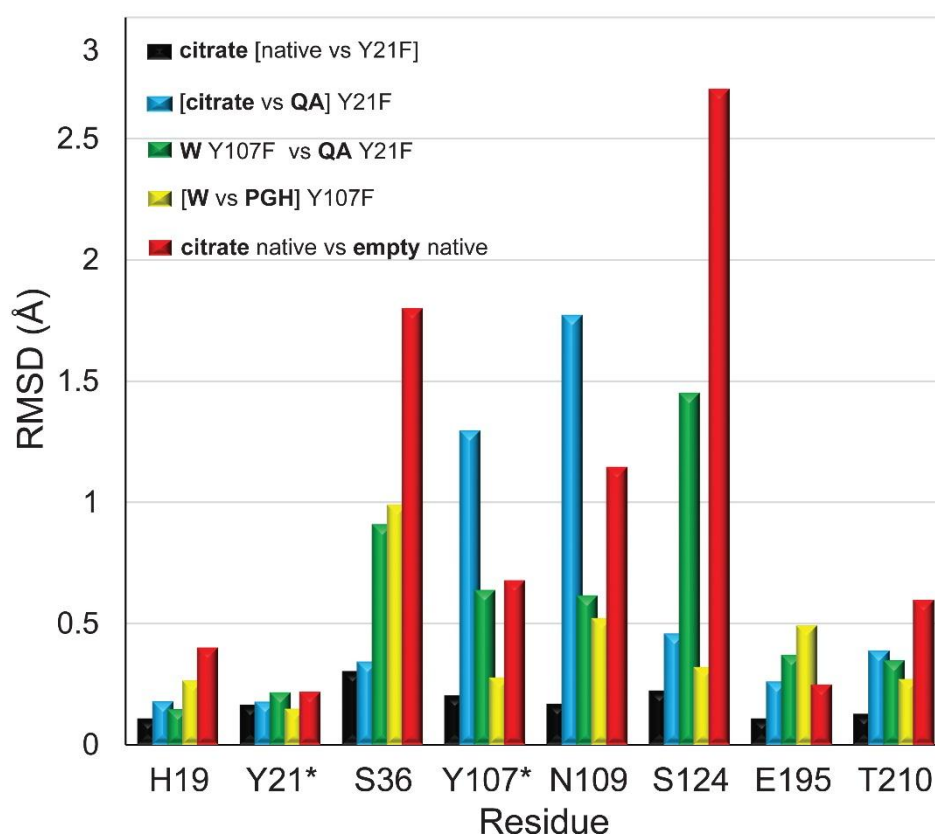

**Figure S5.** Root-mean square deviation (RMSD) calculated for selected residues at the active site between two forms differing by the nature of the ligand bound and/or the mutation at the active site. Y21\* and Y107\* are in some models (see inset) mutated into phenylalanine. Structural superpositions and calculations were carried out with the Schrödinger suite.<sup>3</sup> All X-ray models are from this study except for the “empty” K219R form that is the original *TmNadA*\* un-complexed open structure.<sup>4</sup>

## References

- (1) Begley, T. P.; Kinsland, C.; Mehl, R. A.; Osterman, A.; Dorrestein, P. *Vitam. Horm.* **2001**, *61*, 103.
- (2) Winn, M. D.; Ballard, C. C.; Cowtan, K. D.; Dodson, E. J.; Emsley, P.; Evans, P. R.; Keegan, R. M.; Krissinel, E. B.; Leslie, A. G.; McCoy, A.; McNicholas S. J.; Murshudov G. N.; Pannu N. S.; Potterton E. A.; Powell H. R.; Read R. J.; Vagin A.; Wilson K. S. *Acta Crystallogr. D -Biol. Crystallogr.* **2011**, *67*, 235.
- (3) Schrödinger, LLC, New York, NY, 2016.
- (4) Cherrier, M. V.; Chan, A.; Darnault, C.; Reichmann, D.; Amara, P.; Ollagnier de Choudens, S.; Fontecilla-Camps, J.C. *J. Am. Chem. Soc.* **2014**, *136*, 5253.
